# Supplementary material
Source: Springer Nature journal article supplement (https://www.springerprofessional.de/resource/supplementary/13638_2014_911_MOESM5_ESM.pdf/11899212)

**a**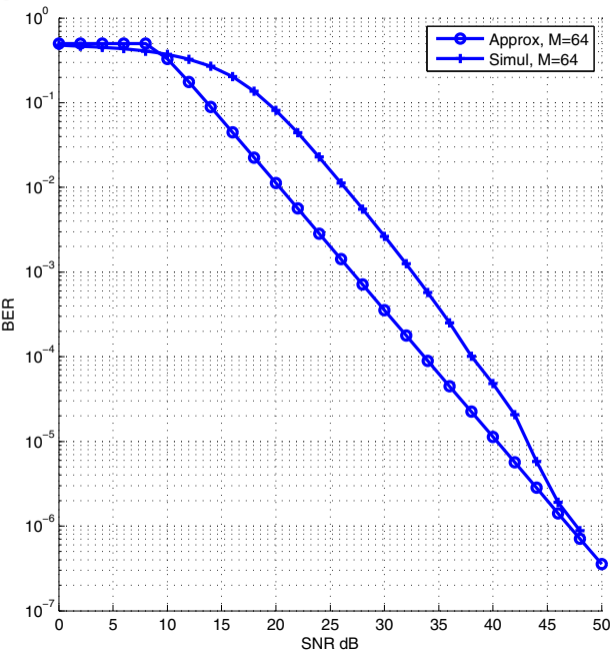**b**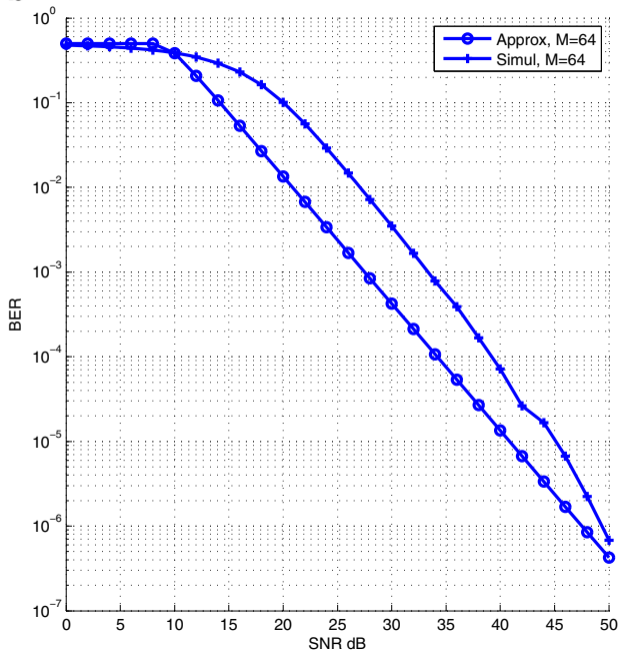

Supplement: MOESM5 [file 11899212]
